# Supplementary material for: Dexamethasone mediates pancreatic cancer progression by glucocorticoid receptor, TGFβ and JNK/AP-1
Source: PubMed Central journal article supplement (PMC5680577; doi:10.1038/cddis.2017.455), 2017-10-05

**A**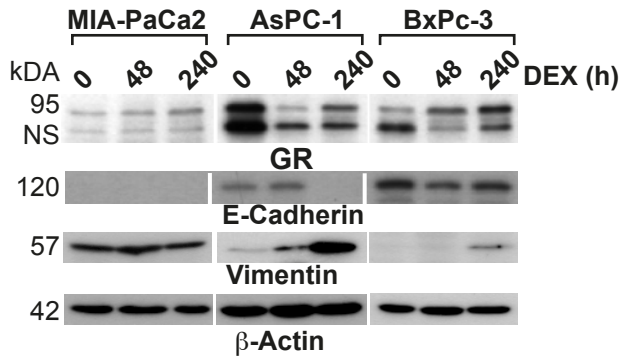**B**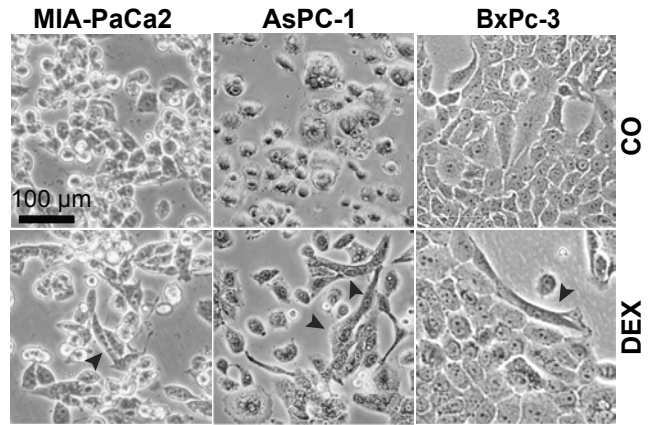**C**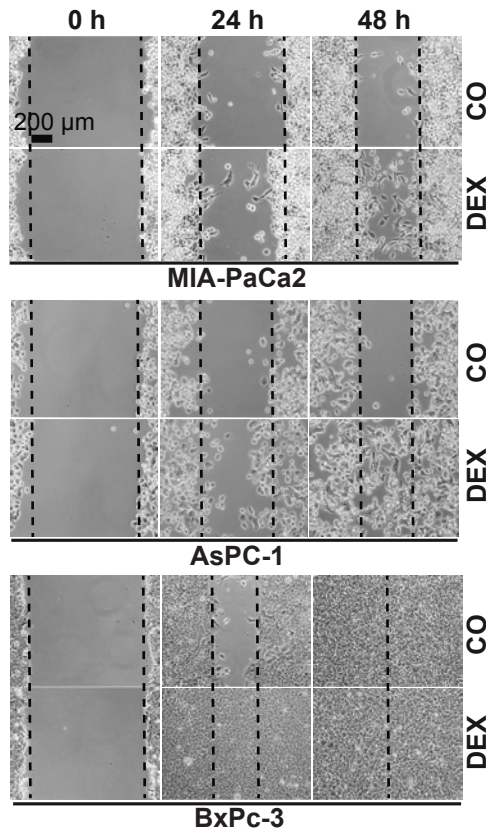**D**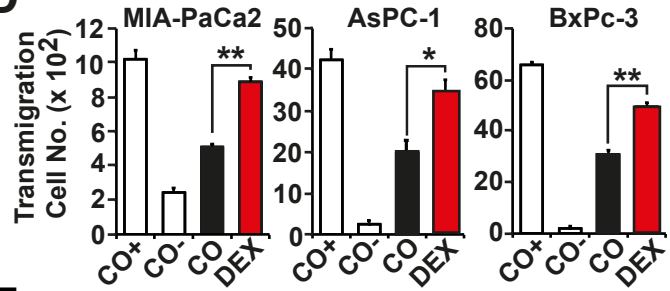**E**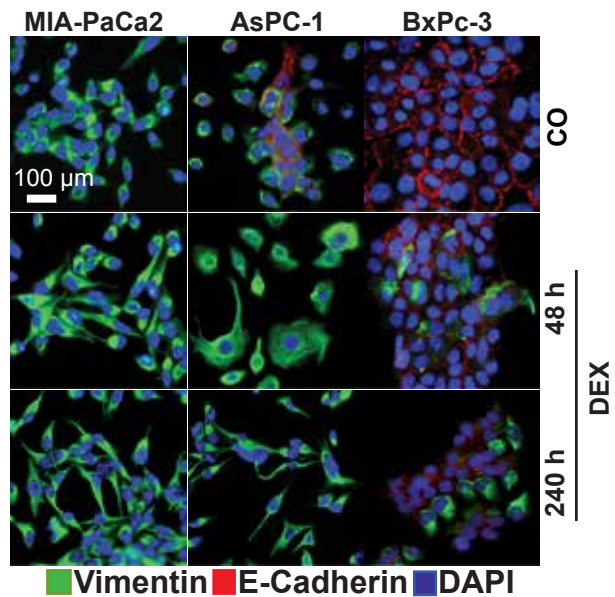

Supplement: cddis2017455x2.pdf [file cddis2017455x2.pdf]
